# Supplementary material for: CeO2–MWCNT nanocomposite based electrochemical sensor for acetaldehyde
Source: Royal Society of Chemistry journal article supplement (doi:10.1039/c5ay00747j), 2015-01-01
Supplement: c5ay00747j1.pdf [file c5ay00747j1.pdf]

## CeO<sub>2</sub>-MWCNT nanocomposite based electrochemical sensor for acetaldehyde

Rayammarakkar M. Shereema<sup>a,b</sup>, Sindhu R. Nambiar<sup>a</sup>, S. Sharath Shankar<sup>a\*</sup> and Talasila P. Rao<sup>a,b\*</sup>

<sup>a</sup>Chemical Sciences & Technology Division (CSTD),

CSIR-National Institute for Interdisciplinary Science & Technology (CSIR-NIIST),

Trivandrum 695019, INDIA. \*e-mail: tprasadarao@rediffmail.com

<sup>b</sup>Academy of Scientific and Innovative Research (AcSIR), New Delhi 110001, India

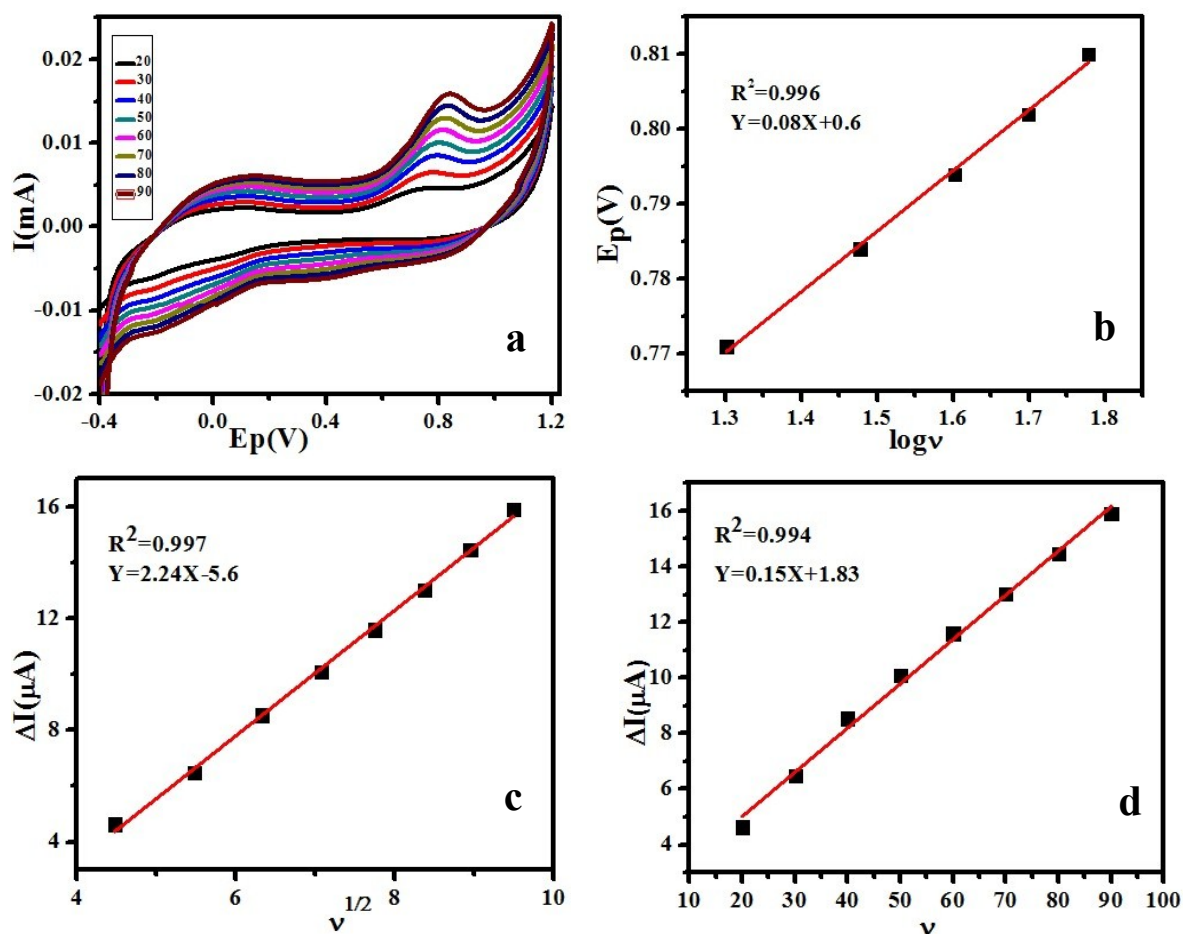

**Fig.S1:** (a) Cyclic voltammograms of oxidation of acetaldehyde (10<sup>-6</sup>M) at various scan rates (20 to 90mV/s) at CeO<sub>2</sub>-MWCNT/GC electrode (b) Plot of Ep Vs log v (c) plot of Ip Vs v<sup>0.5</sup> (d) Plot of Ip Vs v

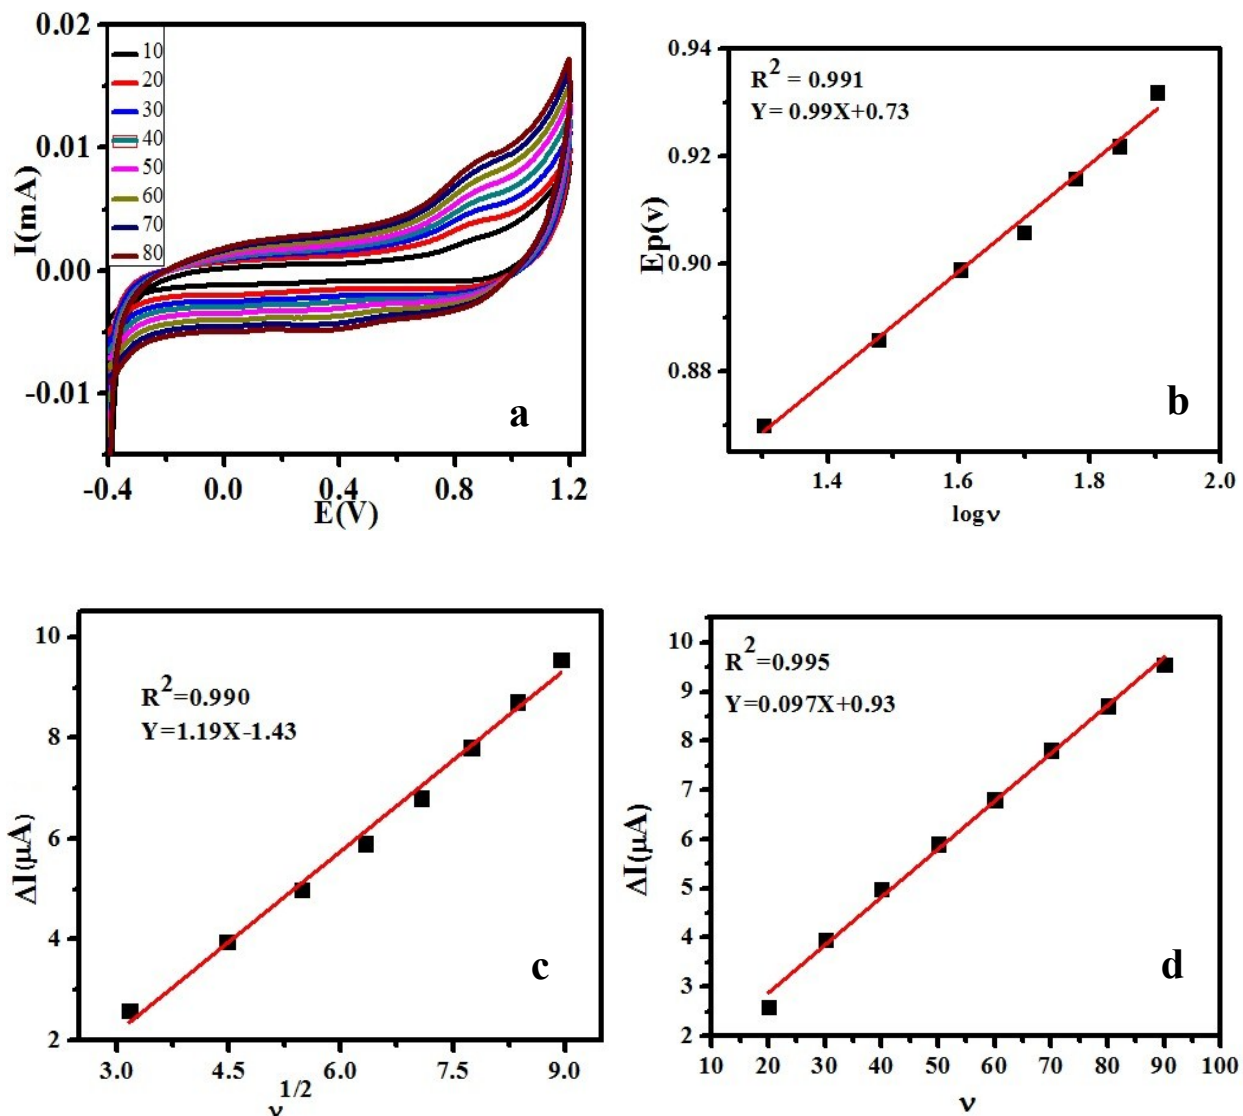

**Fig.S2:(a)** Cyclic voltammograms of oxidation of acetaldehyde ( $10^{-6}\text{M}$ ) at various scan rates (20 to 90mV/s) at  $\text{CeO}_2/\text{GC}$  electrode **(b)** Plot of  $E_p$  Vs  $\log v$ , **(c)** Plot of  $I_p$  Vs  $v^{0.5}$  **(d)** Plot of  $I_p$  Vs  $v$

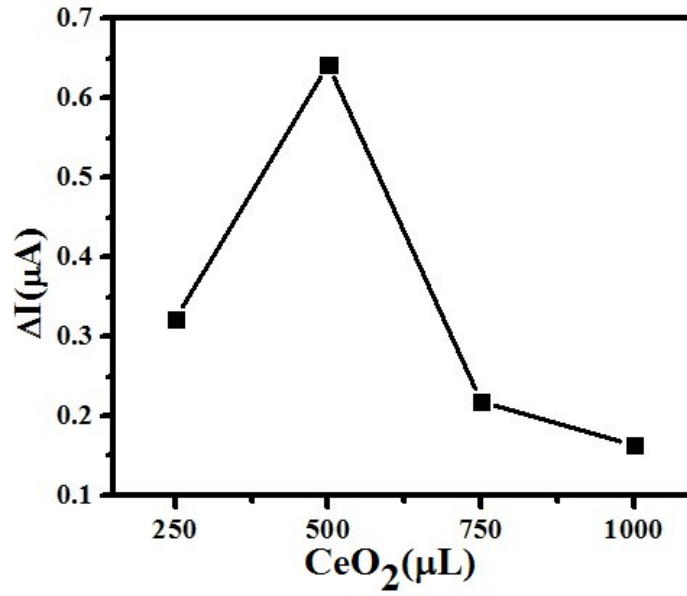

**Fig.S3:** Effect of volume of CeO<sub>2</sub> in nanocomposite on the peak current of acetaldehyde

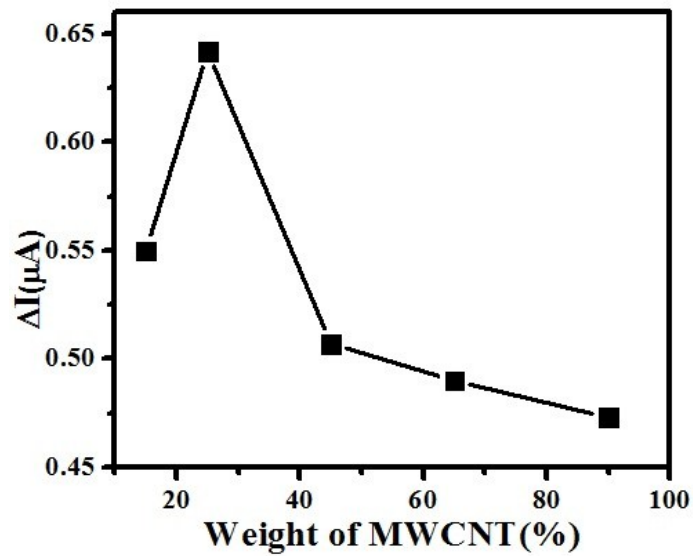

**Fig.S4:** Effect of weight% of MWCNT in nanocomposite on the peak current of acetaldehyde

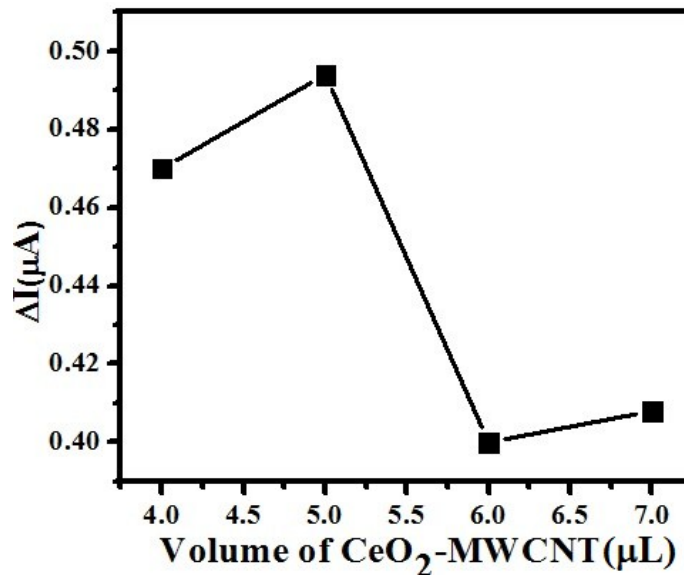

**Fig.S5:** Effect of drop casting volume of CeO<sub>2</sub>/MWCNT nanocomposite on the peak current of acetaldehyde

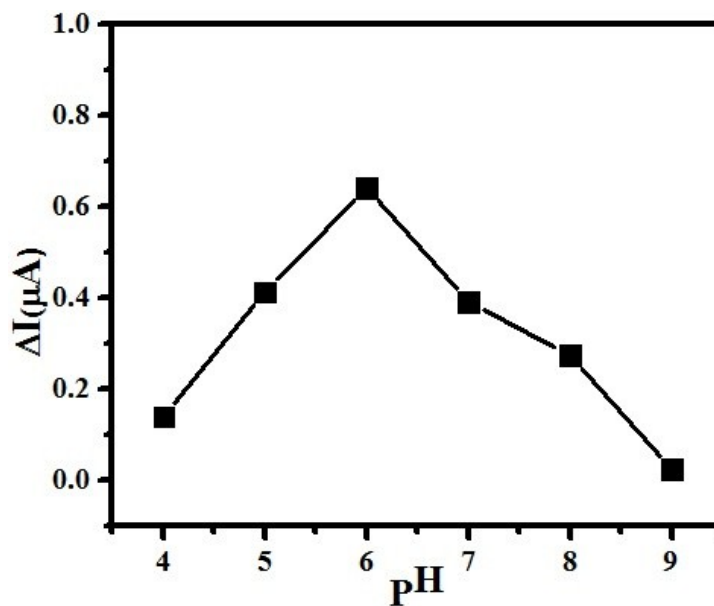

**Fig.S6:** Effect of pH of 0.1M KNO<sub>3</sub> solution on peak current of 10<sup>-6</sup> M acetaldehyde
